# Supplementary material for: De novo variants of CSNK2B cause a new intellectual disability-craniodigital syndrome by disrupting the canonical Wnt signaling pathway
Source: PubMed Central journal article supplement (PMC9092267; doi:10.1016/j.xhgg.2022.100111), 2022-04-18
Supplement: mmc1.pdf [file mmc1.pdf]

**Supplemental information**

***De novo* variants of *CSNK2B* cause a new  
intellectual disability-craniodigital syndrome by  
disrupting the canonical Wnt signaling pathway**

**Maria Asif, Emrah Kaygusuz, Marwan Shinawi, Anna Nickelsen, Tzung-Chien Hsieh, Prerana Wagle, Birgit S. Budde, Jennifer Hochscherf, Uzma Abdullah, Stefan Höning, Christian Nienberg, Dirk Lindenblatt, Angelika A. Noegel, Janine Altmüller, Holger Thiele, Susanne Motameny, Nicole Fleischer, Idan Segal, Lynn Pais, Sigrid Tinschert, Nadra Nasser Samra, Juliann M. Savatt, Natasha L. Rudy, Chiara De Luca, Italian Undiagnosed Diseases Network, Paola Fortugno, Susan M. White, Peter Krawitz, Anna C.E. Hurst, Karsten Niefind, Joachim Jose, Francesco Brancati, Peter Nürnberg, and Muhammad Sajid Hussain**

## Supplemental Data

Supplemental data include clinical details of POBINDS patients, six figures, nine tables, supplemental methods and references.

### Clinical synopsis of POBINDS and IDCS Patients

**Patient 4** of our cohort is recruited from GeneMatcher is a 6-year-old male from Israel (Figure 1). He presented phenotypes including prominent facial dysmorphic features including, long face (HP:0000276), protruding ears (HP:0000411), high forehead (HP:0000348), broad nasal bridge (HP:0000431) and hair hypopigmentation (HP:0005599) (center of head). In addition, low muscle tone (HP:0001252) and ligament laxity (HP:0001388) was also noted. Regarding intellectual abilities , intelligence quotient was noted around 70 which denote mild intellectual disability (HP:0001249). Additionally, low speech intelligibility, learning disability (HP:0001328), emotional regulation disorder, short attention span (HP:0000736) and low verbal performance were also recorded (Table 1).

Electroencephalogram showed centro temporal spike waves signifying epilepsy (HP:0001250). Carnitine level in patient's blood test was higher than normal i.e., 42.3 micro mol/L suggesting mild cardiac defect. On the other hand, the patient did not show any symptoms of craniodigital or teeth anomaly. MRI showed normal brain morphology (data not shown).

**Patient 5** of our cohort was identified via GeneMatcher. The patient's data was submitted to GeneMatcher on behalf of the family after they chose to participate in GenomeConnect, the ClinGen patient registry.<sup>1</sup> Patient 5 (Figure 1) was a 30-year-old American female who died of epileptic seizures (HP:0001250). The patient was reported to have seizures at the age of 1 year. Seizure types included tonic-clonic (HP:0002069), myoclonic (HP:0032794), clonic (HP:0020221), absence seizures (HP:0002121). Moreover, she was evaluated by the clinician at the age of 15 months for possible variant of Maple Syrup Urine disease (MIM#248600) as intermittent "sweet" body odor was noticed. Her physical examination showed a weight of 10.2 kg (25th %ile), a height of 78 cm (25th %ile), and a head circumference of 47 cm (50th %ile). Other phenotypic features include eye movement issues, myopia (HP:0000545), hyperopia (HP:0000540), borderline intellectual functioning (IQ (WASI II) = 67, SS (WRAT IV) = 82), memory impairment (HP:0002354), anxiety (HP:0000739), depression (HP:0000716), obsessive compulsive disorder (HP:0000722), low muscle tone (HP:0001252), proprioception issues (HP:0010831), and prognathism

(HP:0000303) with pointed chin (HP:0000307). Her general physical examination was unremarkable, except for mild generalized hypotonia (HP:0001290) and increased range of motion to her major joints corresponding to her motor tone. She presented no major dysmorphic features except flat feet.

Metabolic evaluation noted very mildly elevated plasma branched chain amino acids, but no elevation in alloluecine. Subsequent skin fibroblast studies in Dean Danner's lab at Emory were normal for the branched-chain ketoacid dehydrogenase complex. Also, urine organic acids were normal.

### **Patient 7**

Individual 7 is a 13-year-old son of healthy unrelated Australian parents, reported previously.<sup>2</sup> He was born at term with birth parameters of weight 3.15 kg, length 48 cm and head circumference 34 cm. He was noted to have a cleft soft palate (HP:0000185) and a patent ductus arteriosus (HP:0001643) and unilateral renal hypoplasia (HPO:0008678). He proceeded to have hypotonia (HP:0001290) and developmental delay and was diagnosed with mild to moderate intellectual disability (HP:0001249) with an IQ of 53 and developmental dyspraxia. He developed absence epilepsy requiring anticonvulsant treatment. He had structurally normal eyes. He had recurrent otitis media and had tympanostomy tube insertion.

Growth at age 13 years showed weight on the 95th centile and height on the 19th centile and head circumference 55th centile. He had anteverted ears (HP:0040080), upslanted palpebral fissures (HP:0000582), bulbous nose (HP:0000414), smooth philtrum (HP:0000319) and thin upper lip vermilion (HP:0000219). He had a supernumerary tooth (HP:0011069) near the midline between his two central incisors. He had brachydactyly (HP:0001156), spatulate fingers and down-sloping shoulders (HP:0200021). Brain MRI performed at the age of 5 years was unremarkable.

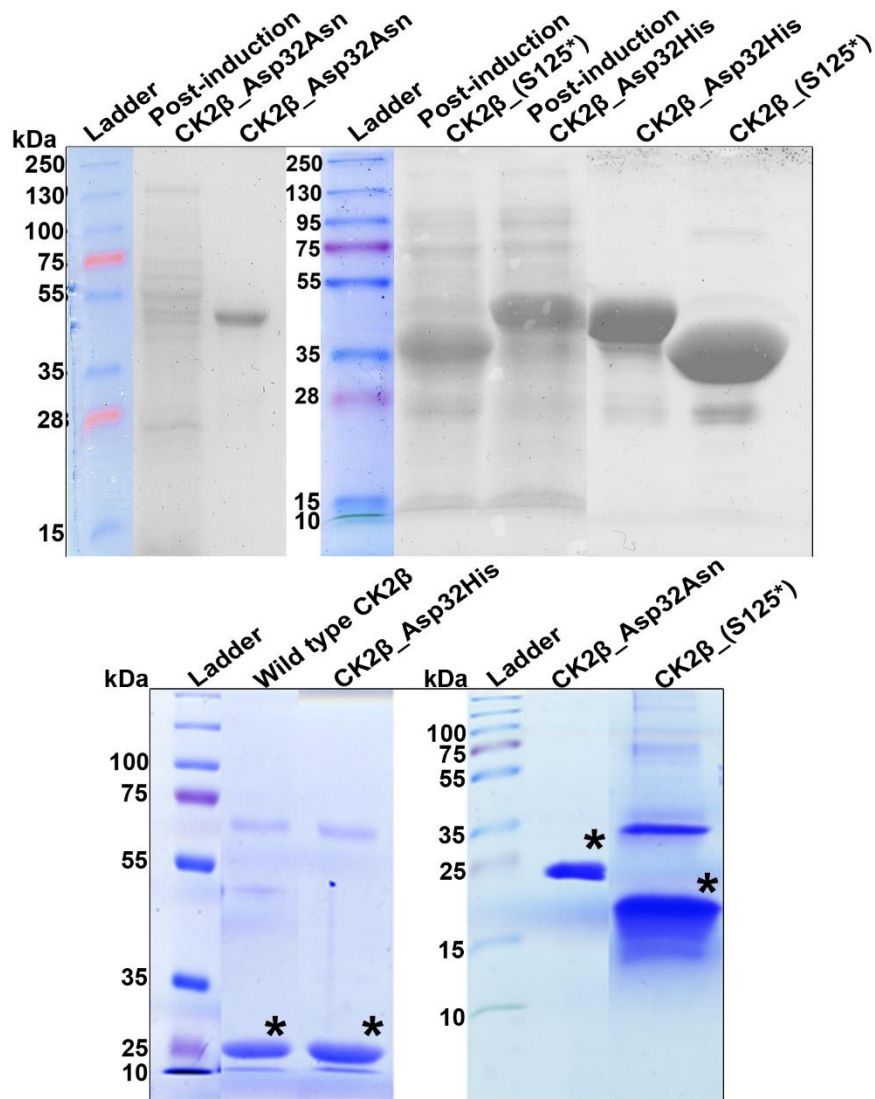

**Figure S1. Purification of GST fused CK2 $\beta$  and obtaining the cleaved protein product**

**(A)** Coomassie stained SDS-PAGE gel showing purified GST tagged wild-type CK2 $\beta$  and its mutants (p.Asp32His, p.Asp32Asn and p.Ser125\*). Note: Image is obtained by two different gels.

**(B)** SDS-PAGE showing purified cleaved protein of wild-type CK2 $\beta$  and its mutants (p.Asp32His, p.Asp32Asn and p.Ser125\*) indicated by asterisks. Note: Image is obtained by two different gels.

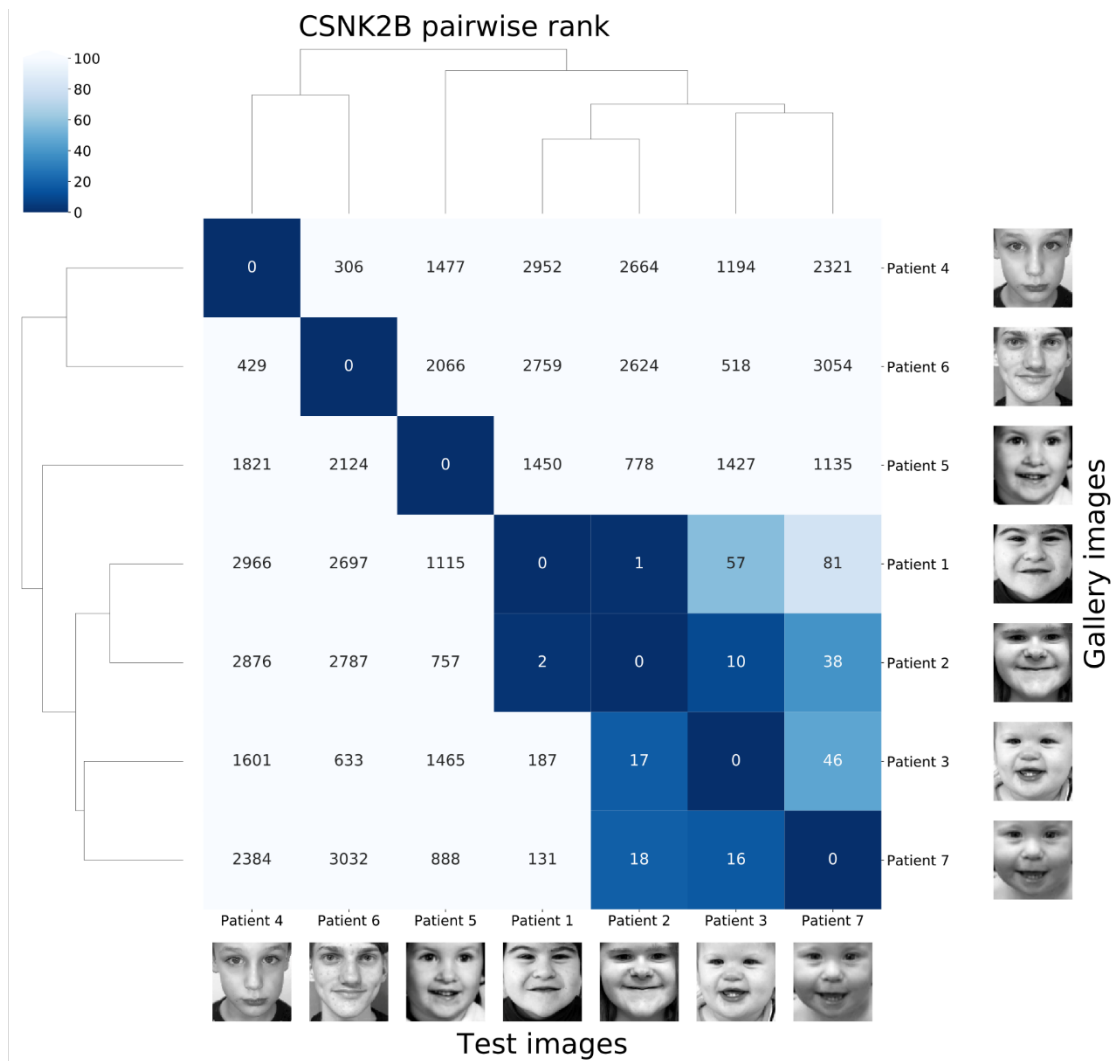

**Figure S2. Comparisons of IDCS and POBINDS patients by GestaltMatcher**

This figure shows the pairwise rank and hierarchical clustering of seven photos in CFPS. Gallery images were the images to be matched in CFPS. Each column is the result of testing one subject in the column and listing the rank of the rest six photos in each row. For example, by testing Patient 2, Patient 1 was on the 1<sup>st</sup> rank, and Patient 3 was on the 17<sup>th</sup> rank of Patient 2. Notably, to avoid bias due to the age difference, we have used the photo of Patient 5 at a younger age instead of the photo shown in Figure 1.

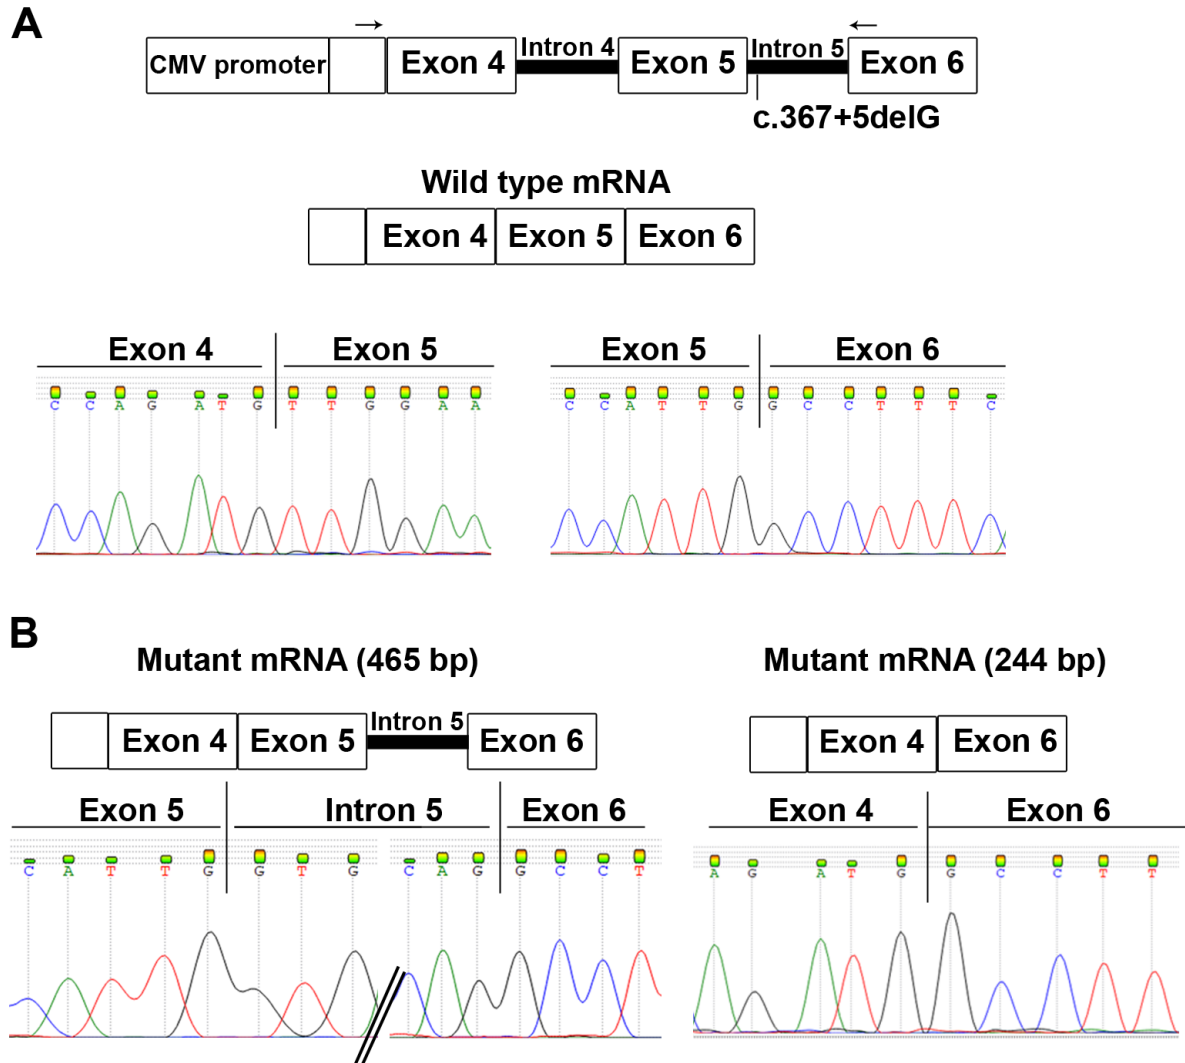

**Figure S3. Minigene splicing assay and Sanger sequencing of the RT-PCR products.**

(A) Upper panel, schematic of part of the mammalian expression vector, pCMV-3Tag-3a and insert. Complete exon 4, 5 and 6, along with intron 4 and 5 of *CSNK2B* (ENST00000375882.7;CSNK2B-203) were cloned. Arrows show the locations of forward (located within the vector) and reverse (situated within exon 6) primers used to amplify the transcribed product. Middle panel, schematic of wild-type transcript. Lower panel, Sanger traces of right side showing the junctions of exon 4 and 5, whereas left side indicate the boundary of exon 5 and 6.

(B) Left panel, schematic (on top) and Sanger traces (in the bottom) of the mutant transcript where complete intron 5 was retained. Right panel, schematic (on top) and Sanger traces (in the bottom) of the mutant transcript where complete exon 5 is skipped.

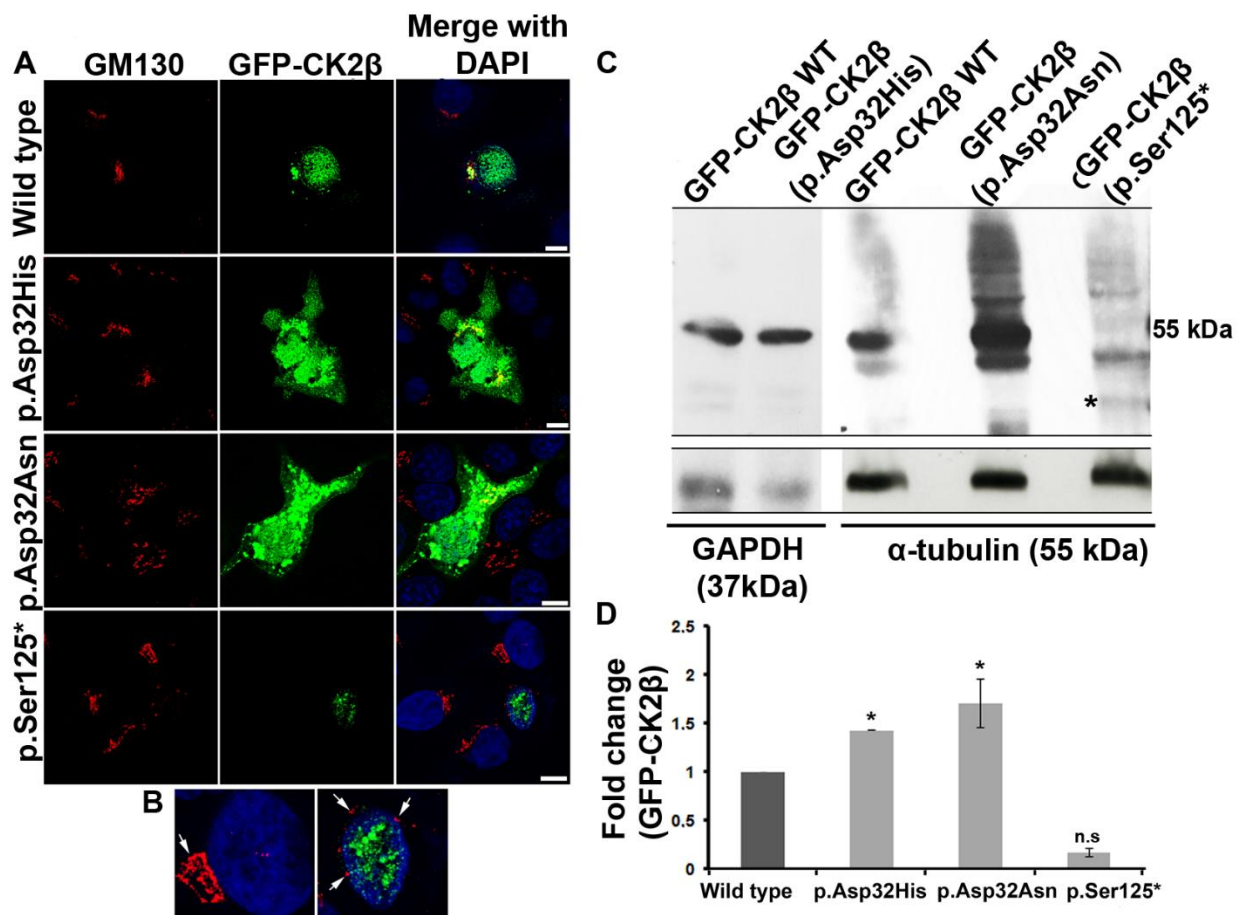

**Figure S4. Localization of GFP tagged wild-type and mutants CK2β**

(A) Confocal microscopy images showing mislocalized mutant GFP tagged CK2β as compared to wild type in HeLa cells. Scale bar is 10 μm.

(B) CK2β mutant (p.Ser125\*), shown at the right hand side, revealing abnormal morphology of Golgi apparatus pointed by white arrows as compared to wild type cell shown at the left hand side.

(C) Immunoblotting shows GFP tagged CK2β on 55 kDa band size in wild type and two mutants (p.Asp32His, p.Asp32Asn). Note that loading control is α-tubulin (55 kDa) except for p.Asp32His, where GAPDH, 37 kDa, was used for loading control. Asterisk (\*) shows the expected band of truncated protein (p.Ser125\*).

(D) Graph showing the fold change of GFP tagged CK2β wild type in comparison with all three mutants, p.Asp32His, p.Asp32Asn and p.Ser125\*. Note: n = 2 and asterisk (\*) shows p values of 0.05 (Student's *t* test). Error bar shows standard deviation.

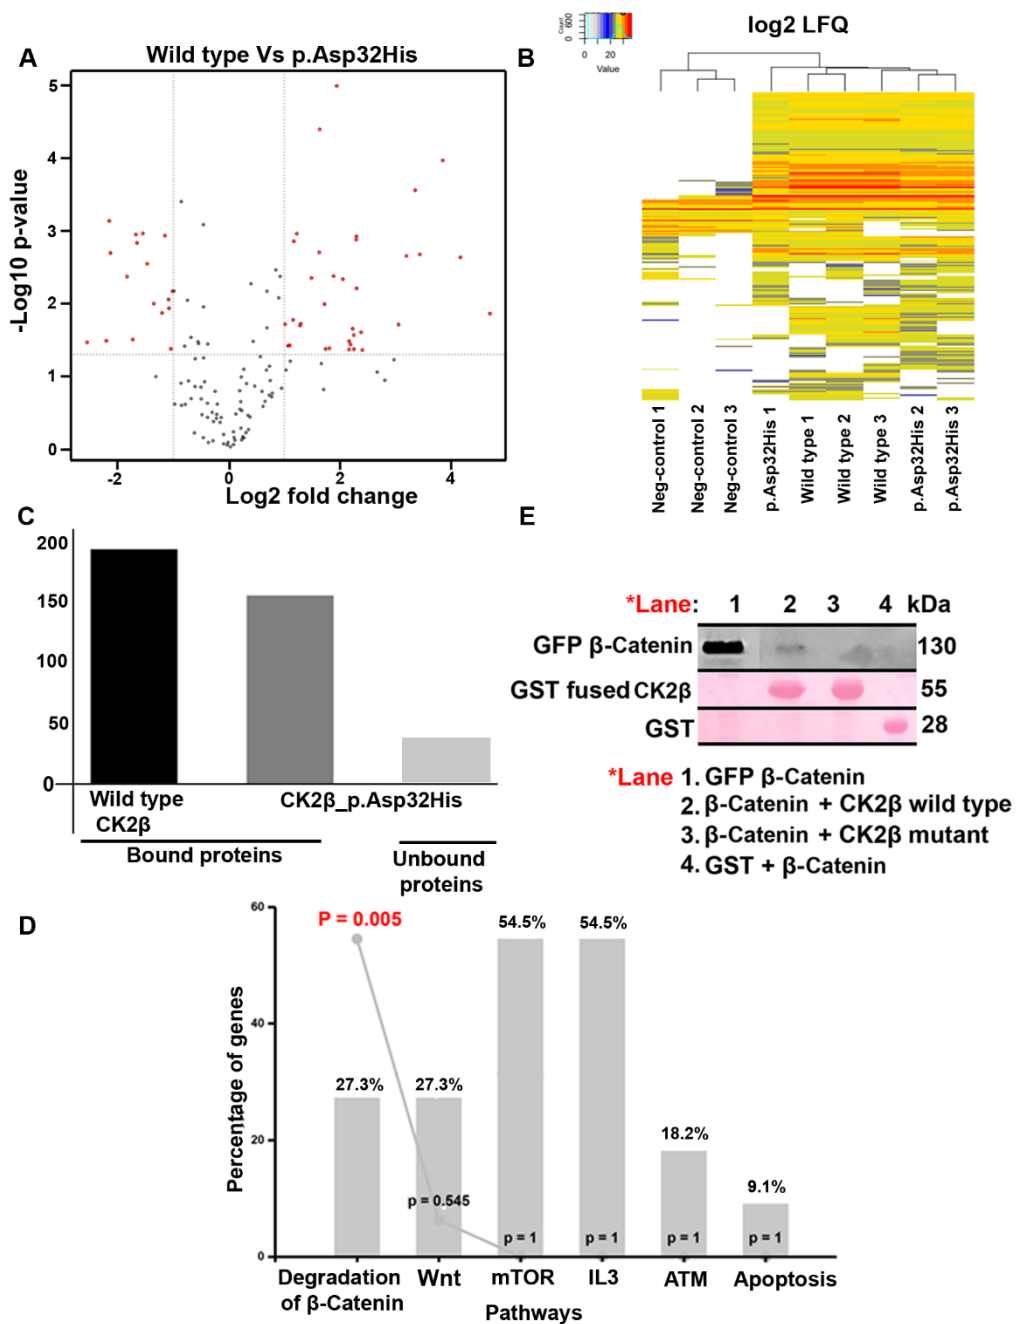

**Figure S5. Mass spectrometry data of wild-type and mutant, p.Asp32His, CK2β**  
**(A)** Volcano plot interaction of protein binding partners of CK2β wild type and mutant (p.Asp32His).

**(B)** Heatmap showing the interaction of binding partners of CK2β wild type and mutant (p.Asp32His). Please notice that there are three replicates of each sample and binding affinity is shown by the color scheme given in the figure.

**(C)** Graph shows total number of proteins (194) detected in mass spectrometry data. 156 proteins showed interaction whereas 38 proteins showed no interaction with mutant GST tagged CK2β as compared to wild type.



(D) Pathway enrichment of proteins showing compromised interaction with mutant CK2 $\beta$ . Specific pathway is written below each bar.

(E) Pull-down assay indicates reduced interaction of over expressed GFP tagged  $\beta$ -catenin with mutant GST tagged CK2 $\beta$  as compared to wild type in HeLa cells. GFP antibody was used to detect GFP-fused proteins. Membrane was stained with Ponceau S to observe the equal amount of GST tagged proteins used in this assay. GST serves as negative control. Key of lane (red with asterisk) is shown below in the figure.

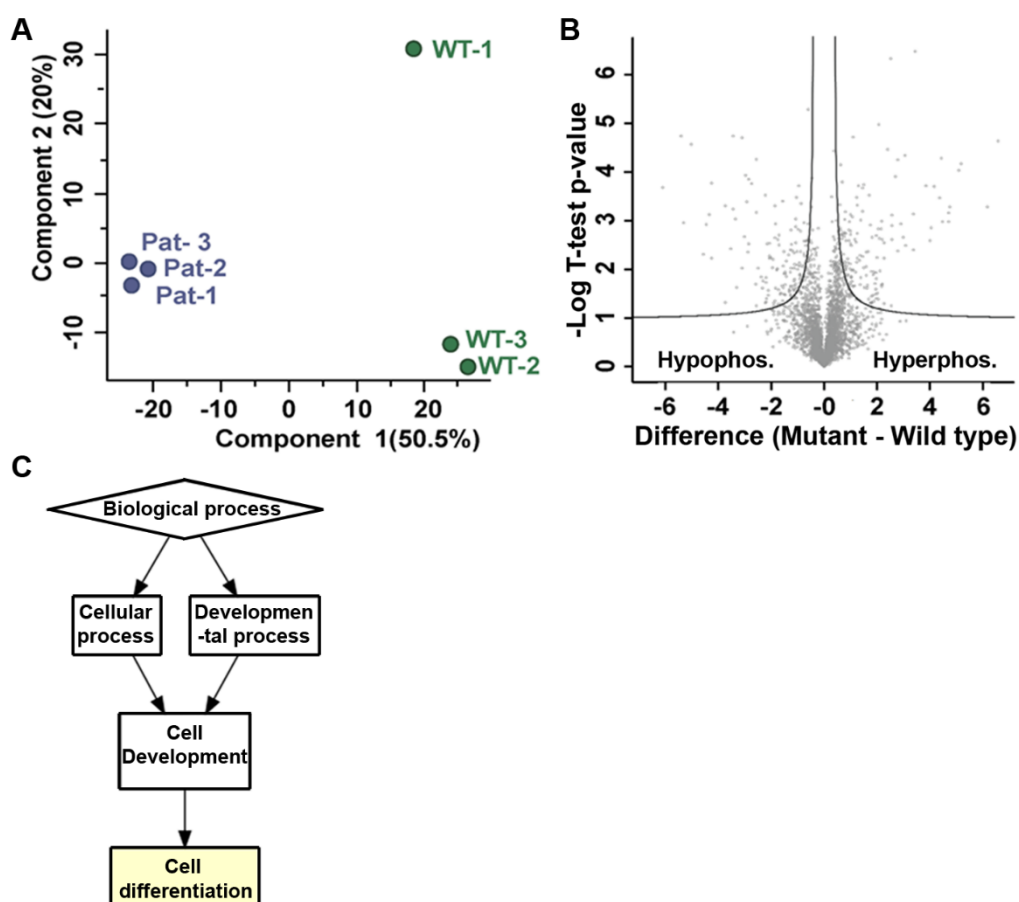

**Figure S6. Phosphoproteome analysis of wild-type and mutant LCLs (p.Asp32His).**

(A) PCA of three replicates of wild-type and mutant samples submitted for phosphoproteome.

(B) Volcano plot of proteins enriched in phosphoproteome.

(C) Graph generated by GOrilla shows pathway enrichment of those protein peptides which showed no phosphorylation in case of p.Asp32His mutant CK2 $\beta$ . Y-axis shows the percentage of the protein involved in specific pathway shown on the X-axis

1 **Supplemental Tables**

2

3 **Table S1.** Pathogenicity scores of *CSNK2B* variants predicted by various in silico tools

| Patient ID | Gene/<br>Transcript<br>ID | cDNA variant               | Protein<br>variant | Inheritance/allele<br>frequency<br>gnomAD | pLI                      | Z-score                | CADD<br>score |
|------------|---------------------------|----------------------------|--------------------|-------------------------------------------|--------------------------|------------------------|---------------|
| Patient 1  | CSNK2B/<br>NM_001320.7    | c.94G>C                    | p.Asp32His         | <i>De novo</i> /0                         | pLI = 0.92<br>o/e = 0.08 | Z = 3.13<br>o/e = 0.21 | 31            |
| Patient 2  |                           | c.94G>A (rs1554169984)     | p.Asp32Asn         | <i>De novo</i> /0                         |                          |                        | 32            |
| Patient 3  |                           | c.94G>A (rs1554169984)     | p.Asp32Asn         | Unknown/0                                 |                          |                        | 32            |
| Patient 4  |                           | c.374C>G                   | p.Ser125*          | <i>De novo</i> /0                         |                          |                        | 39            |
| Patient 5  |                           | c.367+5delG (rs1583610622) | p.?                | Unknown/0                                 |                          |                        | na            |

**Prediction at protein level**

| Prediction tool            | Function                                                     | Prediction                                  |                                             |                             |             |
|----------------------------|--------------------------------------------------------------|---------------------------------------------|---------------------------------------------|-----------------------------|-------------|
|                            |                                                              | p.Asp32His                                  | p.Asp32Asn                                  | p.Ser125*                   | c.367+5delG |
| <b>ACMG interpretation</b> |                                                              | Likely pathogenic (PM1, PM2, PM5, PP3, BP1) | Uncertain Significance (PM1, PM2, PP3, BP1) | Pathogenic (PVS1, PM2, PP3) | -           |
| <b>Mutation Taster</b>     |                                                              | Disease causing (81)                        | Disease causing (23)                        | Disease causing (6.0)       | -           |
| <b>Polyphen-2</b>          |                                                              | Probably damaging (1.0)                     | Probably damaging (1.0)                     | -                           | -           |
| <b>PROVEAN</b>             | Protein variation effect analyzer                            | Deleterious                                 | Deleterious                                 | Deleterious                 | -           |
| <b>SNAP<sup>2</sup></b>    | Functional effect classifier on the basis of neural networks | Pathogenic                                  | Pathogenic                                  | -                           | -           |
| <b>SNAP&amp;GO</b>         | Variant effect prediction using                              |                                             |                                             | -                           | -           |

|                        |                                                                                  |                                |                                 |   |                                 |
|------------------------|----------------------------------------------------------------------------------|--------------------------------|---------------------------------|---|---------------------------------|
|                        | gene ontology terms                                                              | Disease causing                | Disease causing                 |   |                                 |
| <b>PANTHER</b>         | Protein analysis through evolutionary Relationships                              | Disease causing<br>(0.9)       | Disease causing<br>(0.9)        | - | -                               |
| <b>PhD-SNP</b>         | Predictor of human deleterious single nucleotide polymorphisms                   | Disease causing<br>(0.8)       | Disease causing<br>(0.8)        | - | -                               |
| <b>SIFT</b>            | Predict effects of nonsynonymous / missense variants                             | Disease causing<br>(0.03)      | Disease causing<br>(0.03)       | - | -                               |
| <b>SNAP</b>            | Prediction of nonsynonymous functional effects                                   | Disease causing<br>(0.6)       | Disease causing<br>(0.6)        | - | -                               |
| <b>Meta-SNP</b>        | Meta-predictor of disease causing variants                                       | Disease causing<br>(0.74)      | Disease causing<br>(0.74)       | - | -                               |
| <b>MUpro</b>           | Prediction of Protein Stability Changes for Single Site Mutations from Sequences | Decreased<br>-1.2239963        | Decreased<br>-1.045697          | - | -                               |
| <b>I-Mutant</b>        |                                                                                  | Decreased<br>(DDG=0.41, °C=25) | Decreased<br>(DDG=-0.53, °C=25) | - | -                               |
|                        |                                                                                  | Increased<br>(DDG=0.30, °C=60) | Increased<br>(DDG=0.16, °C=25)  |   | -                               |
|                        |                                                                                  | Increased<br>(DDG=0.65, °C=80) | Increased<br>(DDG=0.50, °C=25)  |   | -                               |
| <b>NetGene2 Server</b> | -                                                                                | -                              | -                               | - | Loss of splice donor site       |
| <b>ASSP</b>            | Alternative Splice Site Predictor                                                |                                |                                 |   | Loss of constitutive donor site |

|                             |                           |  |  |  |  |                                                                                                                     |
|-----------------------------|---------------------------|--|--|--|--|---------------------------------------------------------------------------------------------------------------------|
| <b>MaxEntScan::score5ss</b> | For human 5' splice sites |  |  |  |  | <b>WT:</b> MAXENT:9.27, MDD: 13.68, MM: 8.22, WMM: 7.62<br><b>MUT:</b> MAXENT: 2.11, MDD: 2.78, MM: 3.19, WMM: 3.71 |
|-----------------------------|---------------------------|--|--|--|--|---------------------------------------------------------------------------------------------------------------------|

- 1 Loss-of-function intolerant (pLI), delta delta G (DDG), combined annotation dependent depletion (CADD) and Alternative Splice Site Predictor (ASSP). Note: Values given in the parentheses indicate
- 2 the scores obtained from respective tool.

3 **Table S2.** List of oligonucleotides used for co-segregation, site-directed mutagenesis and qPCR

| <b>Primer ID</b>                                                                                      | <b>Forward primer, 5' to 3'</b>             | <b>Reverse primer, 5' to 3'</b>            |
|-------------------------------------------------------------------------------------------------------|---------------------------------------------|--------------------------------------------|
| <b>Oligonucleotides sequences for co-segregation analysis</b>                                         |                                             |                                            |
| CSNK2B-Ex2-F                                                                                          | GGTGAAGTAGGGAGAGACACAAG                     | GCATGAATTTGGGGTTAAAGA                      |
| <b>Oligonucleotides sequences for site-directed mutagenesis</b>                                       |                                             |                                            |
| CSNK2B;c.94G>C                                                                                        | GTGGATGAAGACTACATCCAGCACAAATTTAATCTTACTGGAC | GTCCAGTAAGATTAATTTGTGCTGGATGTAGTCTTCATCCAC |
| CSNK2B;c.94G>A                                                                                        | GTGGATGAAGACTACATCCAGAACAATTTAATCTTACTGGAC  | GTCCAGTAAGATTAATTTGTTCTGGATGTAGTCTTCATCCAC |
| CSNK2B;c.374C>G                                                                                       | GCTTCCCATTGGCCTTTGAGACATCCCAGG              | CCTGGGATGTCTCAAAGGCCAATGGGAAGC             |
| <b>Oligonucleotides sequences for quantitative real time PCR</b>                                      |                                             |                                            |
| CSNK2B;c.94G>A                                                                                        | TCTTCTGTGAAGTGGATGAAGAC                     | CCTTGCTGGTACTTTTCCAAC                      |
| CSNK2B;c.94G>A                                                                                        | GTGAAGCCATGGTGAAGCTC                        | GACTGGGCTCTTGAAGTTGC                       |
| GAPDH                                                                                                 | TGACAACAGCCTCAAGATCATCAGCAA                 | GTTTTTCTAGACGGCAGGTCAGGTCCA                |
| <b>Oligonucleotides sequences for sequencing RT-PCR product obtained from minigene splicing assay</b> |                                             |                                            |

*Vector+CSNK2B*

TGAACCGTCAGATCCGCTAG

GCACTTGGGGCAGTAGAGC

1

2

1 **Table S3.** List of proteins identified in mass spectrometry analysis.

| Sr. No                        | Gene names          | Protein names                                                  | Status       | Interaction     |
|-------------------------------|---------------------|----------------------------------------------------------------|--------------|-----------------|
| <b>Cell Adhesion Proteins</b> |                     |                                                                |              |                 |
| 1                             | <i>DSC1</i>         | Desmocollin-1                                                  | Known        | No effect       |
| 2                             | <b><i>PNN</i></b>   | <b>Pinin</b>                                                   | <b>Known</b> | <b>Impaired</b> |
| 3                             | <i>DSG1</i>         | Desmoglein-1                                                   | Known        | No effect       |
| <b>Chaperons</b>              |                     |                                                                |              |                 |
| 4                             | <i>TOR4A</i>        | Torsin-4A                                                      | Novel        | No effect       |
| <b>Chromatin-related</b>      |                     |                                                                |              |                 |
| 5                             | <i>SRCAP</i>        | Helicase SRCAP                                                 |              | No effect       |
| 6                             | <b><i>ACIN1</i></b> | <b>Apoptotic chromatin condensation inducer in the nucleus</b> | <b>Known</b> | <b>Impaired</b> |
| 7                             | <b><i>KAT7</i></b>  | <b>Histone acetyltransferase KAT7</b>                          | <b>Known</b> | <b>Impaired</b> |
| <b>Cytoskeleton</b>           |                     |                                                                |              |                 |
| 8                             | <i>KANK2</i>        | KN motif and ankyrin repeat domain-containing protein 2        | Novel        | No effect       |
| 9                             | <i>GOLGA6L10</i>    | Golgin subfamily A member 6-like protein 10                    | Novel        | No effect       |
| 10                            | <i>ACTB</i>         | Actin, cytoplasmic 1                                           | Known        | No effect       |
| 11                            | <i>SUN2</i>         | SUN domain-containing protein 2                                | Known        | No effect       |
| 12                            | <i>TUBA1B</i>       | Tubulin alpha-1B chain                                         | Novel        | No effect       |
| 13                            | <i>GOLGA6L10</i>    | Golgin subfamily A member 6-like protein 10                    | Novel        | No effect       |
| 14                            | <i>ACTG1</i>        | Actin, cytoplasmic 2                                           | Novel        | No effect       |
| 15                            | <i>PFN1</i>         | Profilin-1                                                     | Novel        | No effect       |

|                                            |                     |                                                  |              |                 |
|--------------------------------------------|---------------------|--------------------------------------------------|--------------|-----------------|
| 16                                         | <i>TUBB2B</i>       | Tubulin beta-2B chain                            | Novel        | No effect       |
| 17                                         | <i>TUBA4A</i>       | Tubulin alpha-4A chain                           | Novel        | No effect       |
| 18                                         | <i>TUBB</i>         | Tubulin beta chain                               | Novel        | No effect       |
| 19                                         | <i>TUBB4B</i>       | Tubulin beta-4B chain                            | Novel        | No effect       |
| 20                                         | <i>MAP7</i>         | Ensconsin                                        | Known        | No effect       |
| 21                                         | <i>TUBB4A</i>       | Tubulin beta-4A chain                            | Novel        | No effect       |
| 22                                         | <i>TUBA1A</i>       | Tubulin alpha-1A chain                           | Novel        | No effect       |
| <b>23</b>                                  | <b><i>MTCL1</i></b> | <b>Microtubule cross-linking factor 1</b>        | <b>Novel</b> | <b>Impaired</b> |
| 24                                         | <i>KRT18</i>        | Keratin, type I cytoskeletal 18                  | Novel        | No effect       |
| 25                                         | <i>TUBB2A</i>       | Tubulin beta-2A chain                            | Novel        | No effect       |
| <b><i>Extracellular matrix protein</i></b> |                     |                                                  |              |                 |
| 26                                         | <i>LGALS7</i>       | Galectin-7                                       | Novel        | No effect       |
| 27                                         | <i>HDGFRP2</i>      | Hepatoma-derived growth factor-related protein 2 | Known        | No effect       |
| 28                                         | <i>JPH1</i>         | Junctophilin 1                                   | Known        | No effect       |
| 29                                         | <i>BRPF1</i>        | Peregrin                                         | Known        | No effect       |
| <b><i>Membrane traffic protein</i></b>     |                     |                                                  |              |                 |
| 31                                         | <i>SYBU</i>         | Syntabulin                                       | Novel        | No effect       |
| 32                                         | <i>LMAN1</i>        | Lectin, Mannose Binding 1                        | Known        | No effect       |
| 33                                         | <i>LLGL1</i>        | Lethal(2) giant larvae protein homolog 1         | Novel        | No effect       |
| 34                                         | <i>EMD</i>          | Emerin                                           | Novel        | No effect       |
| 35                                         | <i>LEMD2</i>        | LEM Domain Nuclear Envelope Protein 2            | Known        | No effect       |
| 36                                         | <i>REEP4</i>        | Receptor expression-enhancing protein 4          | Known        | No effect       |



| <b>Metabolite interconversion enzyme</b> |                      |                                                                                |              |                 |
|------------------------------------------|----------------------|--------------------------------------------------------------------------------|--------------|-----------------|
| 37                                       | <i>LBR</i>           | Delta(14)-sterol reductase                                                     | Known        | No effect       |
| 38                                       | <i>STT3B</i>         | Dolichyl-diphosphooligosaccharide--protein glycosyltransferase subunit STT3B   | Known        | No effect       |
| 39                                       | <i>LPL</i>           | Lipoprotein lipase                                                             | Novel        | No effect       |
| 40                                       | <i>PFKP</i>          | ATP-dependent 6-phosphofructokinase, platelet type                             | Novel        | No effect       |
| 41                                       | <i>ACSL3</i>         | Long-chain-fatty-acid--CoA ligase 3                                            | Novel        | No effect       |
| 42                                       | <i>TECR</i>          | Very-long-chain enoyl-CoA reductase                                            | Known        | No effect       |
| 43                                       | <i>TKT</i>           | Transketolase                                                                  | Known        | No effect       |
| 44                                       | <i>RPN1</i>          | Dolichyl-diphosphooligosaccharide protein glycosyltransferase subunit 1        | Known        | No effect       |
| 45                                       | <i>CPS1</i>          | Carbamoyl-phosphate synthase [ammonia]                                         | Novel        | No effect       |
| 46                                       | <i>PIK3C2A</i>       | Phosphatidylinositol 4-phosphate 3-kinase C2 domain-containing subunit alpha   | Novel        | No effect       |
| 47                                       | <i>DPM1</i>          | Dolichol-phosphate mannosyltransferase subunit 1                               | Known        | No effect       |
| <b>Nucleic acid binding protein</b>      |                      |                                                                                |              |                 |
| 48                                       | <b><i>POLR2A</i></b> | <b>DNA-directed RNA polymerase;DNA-directed RNA polymerase II subunit RPB1</b> | <b>Known</b> | <b>Impaired</b> |
| 49                                       | <i>MSH6</i>          | DNA mismatch repair protein Msh6                                               | Known        | No effect       |
| 50                                       | <b><i>REXO1</i></b>  | <b>RNA exonuclease 1 homolog</b>                                               | <b>Novel</b> | <b>Impaired</b> |
| 51                                       | <b><i>CLASRP</i></b> | <b>CLK4-associating serine/arginine rich protein</b>                           | <b>Novel</b> | <b>Impaired</b> |
| 52                                       | <b><i>TCOF1</i></b>  | <b>Treacle protein</b>                                                         | <b>Known</b> | <b>Impaired</b> |
| 53                                       | <i>PAPD7</i>         | Terminal nucleotidyltransferase 4A                                             | Novel        | No effect       |
| 54                                       | <i>DHX38</i>         | Pre-mRNA-splicing factor ATP-dependent RNA helicase PRP16                      | Novel        | No effect       |
| 55                                       | <i>LSM14B</i>        | Protein LSM14 homolog B                                                        | Novel        | No effect       |
| 56                                       | <i>DHX16</i>         | Pre-mRNA-splicing factor ATP-dependent RNA helicase DHX16                      | Known        | No effect       |

|           |                       |                                                             |              |                 |
|-----------|-----------------------|-------------------------------------------------------------|--------------|-----------------|
| 57        | <i>NOP58</i>          | Nucleolar protein 58                                        | Known        | No effect       |
| 58        | <i>FAM133A</i>        | Protein FAM133A                                             | Novel        | No effect       |
| <b>59</b> | <b><i>DROSHA</i></b>  | <b>Ribonuclease 3</b>                                       | <b>Known</b> | <b>Impaired</b> |
| 60        | <i>SRRM1</i>          | Serine/arginine repetitive matrix protein 1                 | Known        | No effect       |
| 61        | <i>SUB1</i>           | Activated RNA polymerase II transcriptional coactivator p15 | Known        | No effect       |
| 62        | <i>COIL</i>           | Coilin                                                      | Known        | No effect       |
| 63        | <i>RNPS1</i>          | RNA-binding protein with serine-rich domain 1               | Known        | No effect       |
| 64        | <i>FAM133B</i>        | Protein FAM133B                                             | Novel        | No effect       |
| <b>65</b> | <b><i>GPATCH2</i></b> | <b>G patch domain-containing protein 2</b>                  | <b>Known</b> | <b>Impaired</b> |
| 66        | <i>MCM7</i>           | DNA replication licensing factor MCM7                       | Known        | No effect       |
| 67        | <i>CCNL1</i>          | DNA replication licensing factor MCM2                       | Known        | No effect       |
| 68        | <i>CTR9</i>           | RNA polymerase-associated protein CTR9 homolog              | Known        | No effect       |
| 69        | <i>ZRANB2</i>         | Zinc finger Ran-binding domain-containing protein 2         | Known        | No effect       |
| <b>70</b> | <b><i>THRAP3</i></b>  | <b>Thyroid hormone receptor-associated protein 3</b>        | <b>Known</b> | <b>Impaired</b> |
| 71        | <i>H2AFV</i>          | Histone H2A.V                                               | Novel        | No effect       |
| <b>72</b> | <b><i>BCLAF1</i></b>  | <b>Bcl-2-associated transcription factor 1</b>              | <b>Known</b> | <b>Impaired</b> |
| 73        | <i>RBM39</i>          | RNA-binding protein 39                                      | Novel        | No effect       |
| 74        | <i>PRPF38A</i>        | Pre-mRNA-splicing factor 38A                                | Novel        | No effect       |
| <b>75</b> | <b><i>IWS1</i></b>    | <b>Protein IWS1 homolog</b>                                 | <b>Known</b> | <b>Impaired</b> |
| 76        | <i>CWC25</i>          | Pre-mRNA-splicing factor CWC25 homolog                      | Novel        | No effect       |
| 77        | <i>RSRC1</i>          | Serine/Arginine-related protein 53                          | Novel        | No effect       |
| 78        | <i>MMS22L</i>         | Protein MMS22-like                                          | Novel        | No effect       |

|                                  |                 |                                                    |              |                 |
|----------------------------------|-----------------|----------------------------------------------------|--------------|-----------------|
| <b>79</b>                        | <b>GPBP1</b>    | <b>Vasculin</b>                                    | <b>Novel</b> | <b>Impaired</b> |
| 80                               | <i>HLTF</i>     | Helicase-like transcription factor                 | Novel        | No effect       |
| 81                               | <i>SSRP1</i>    | FACT complex subunit SSRP1                         | Novel        | No effect       |
| 82                               | <i>SNAPC4</i>   | snRNA-activating protein complex subunit 4         | Novel        | No effect       |
| 83                               | <i>ERCC5</i>    | DNA repair protein complementing XP-G cells        | Novel        | No effect       |
| 84                               | <i>RAD50</i>    | DNA repair protein RAD50                           | Novel        | No effect       |
| 85                               | <i>AKAP17A</i>  | A-kinase anchor protein 17A                        | Novel        | No effect       |
| <b>86</b>                        | <b>SRRM2</b>    | <b>Serine/arginine repetitive matrix protein 2</b> | <b>Known</b> | <b>Impaired</b> |
| 87                               | <i>ATRX</i>     | Transcriptional regulator ATRX                     | Novel        | No effect       |
| 88                               | <i>PAF1</i>     | RNA polymerase II-associated factor 1 homolog      | Novel        | No effect       |
| 89                               | <i>POLD3</i>    | DNA polymerase delta subunit 3                     | Novel        | No effect       |
| 90                               | <i>PRPF19</i>   | Pre-mRNA-processing factor 19                      | Novel        | No effect       |
| 91                               | <i>CBX2</i>     | Chromobox 2                                        | Known        | No effect       |
| 92                               | <i>RTF1</i>     | RNA polymerase-associated protein RTF1 homolog     | Novel        | No effect       |
| 93                               | <i>PCNA</i>     | Proliferating cell nuclear antigen                 | Known        | No effect       |
| <b>Protein modifying enzymes</b> |                 |                                                    |              |                 |
| 94                               | <i>CDK11A</i>   | Cyclin-dependent kinase 11A                        | Known        | No effect       |
| 95                               | <i>CDC42BPA</i> | Serine/threonine-protein kinase MRCK alpha         | Novel        | No effect       |
| 96                               | <i>TOPORS</i>   | E3 ubiquitin-protein ligase Topors                 | Novel        | No effect       |
| <b>97</b>                        | <b>RBBP6</b>    | <b>E3 ubiquitin-protein ligase RBBP6</b>           | <b>Known</b> | <b>Impaired</b> |
| 98                               | <i>RNF111</i>   | E3 ubiquitin-protein ligase Arkadia                | Novel        | No effect       |
| 99                               | <i>TFRC</i>     | Transferrin receptor protein 1                     | Novel        | No effect       |

|                                                   |                     |                                                              |              |                 |
|---------------------------------------------------|---------------------|--------------------------------------------------------------|--------------|-----------------|
| 100                                               | <i>ARL6IP4</i>      | ADP-ribosylation factor-like protein 6-interacting protein 4 | Novel        | No effect       |
| 101                                               | <i>PHF8</i>         | Histone lysine demethylase PHF8                              | Novel        | No effect       |
| 102                                               | <i>FBXL19</i>       | F-box/LRR-repeat protein 19                                  | Novel        | No effect       |
| 103                                               | <i>SCD</i>          | Acyl-CoA desaturase                                          | Novel        | No effect       |
| <b>104</b>                                        | <b><i>SETD2</i></b> | <b>Histone-lysine N-methyltransferase SETD2</b>              | <b>Known</b> | <b>Impaired</b> |
| 105                                               | <i>SGPL1</i>        | Sphingosine-1-phosphate lyase 1                              | Novel        | No effect       |
| 106                                               | <i>CDK11B</i>       | Cyclin-dependent kinase 11B                                  | Novel        | No effect       |
| <b><i>Protein binding activity modulators</i></b> |                     |                                                              |              |                 |
| 107                                               | <i>RAN</i>          | GTP-binding nuclear protein Ran                              | Known        | No effect       |
| 108                                               | <i>CCNK</i>         | Cyclin-K                                                     | Known        | No effect       |
| 109                                               | <i>CCNL2</i>        | Cyclin-L2                                                    | Known        | No effect       |
| 110                                               | <i>ARF3</i>         | ADP-ribosylation factor 3                                    | Known        | No effect       |
| 111                                               | <i>ARF1</i>         | ADP-ribosylation factor 1                                    | Known        | No effect       |
| 112                                               | <i>CCNL1</i>        | Cyclin-L1                                                    | Novel        | No effect       |
| 113                                               | <i>ARF4</i>         | ADP-ribosylation factor 4                                    | Known        | No effect       |
| 114                                               | <i>NKAP</i>         | NF-kappa-B-activating protein                                | Novel        | No effect       |
| 115                                               | <i>UBB</i>          | Polyubiquitin-B                                              | Novel        | No effect       |
| <b><i>Scaffold adaptor proteins</i></b>           |                     |                                                              |              |                 |
| 116                                               | <i>CHD2</i>         | Chromodomain-helicase-DNA-binding protein 2                  | Known        | No effect       |
| 117                                               | <i>DVL2</i>         | <b>Segment polarity protein dishevelled homolog DVL-2</b>    | <b>Known</b> | <b>Impaired</b> |
| 118                                               | <i>PRICKLE3</i>     | <b>Prickle planar cell polarity protein 3</b>                | <b>Novel</b> | <b>Impaired</b> |
| 119                                               | <i>BRD2</i>         | <b>Bromodomain-containing protein 2</b>                      | <b>Known</b> | <b>Impaired</b> |

|                              |                       |                                                                   |       |           |
|------------------------------|-----------------------|-------------------------------------------------------------------|-------|-----------|
| 120                          | <i>CACTIN</i>         | Cactin                                                            | Novel | No effect |
| 121                          | <i>DVL1P1</i>         | putative segment polarity protein dishevelled homolog DVL1P1      | Novel | Impaired  |
| 122                          | <i>DVL1</i>           | Segment polarity protein dishevelled homolog DVL-1                | Known | Impaired  |
| 123                          | <i>LENG8</i>          | Leukocyte receptor cluster member 8                               | Known | Impaired  |
| 124                          | <i>CEP170</i>         | Centrosomal protein of 170 kDa                                    | Known | No effect |
| 125                          | <i>DLG5</i>           | Disks large homolog 5                                             | Novel | Impaired  |
| 126                          | <i>DVL3</i>           | Segment polarity protein dishevelled homolog DVL-3                | Known | Impaired  |
| <b>Transporter proteins</b>  |                       |                                                                   |       |           |
| 127                          | <i>OXA1L</i>          | Mitochondrial inner membrane protein OXA1L                        | Novel | No effect |
| 128                          | <i>SLC27A4</i>        | Long-chain fatty acid transport protein 4                         | Novel | No effect |
| 129                          | <i>POM121</i>         | Nuclear envelope pore membrane protein POM 121                    | Novel | No effect |
| 130                          | <i>FAM120A</i>        | Constitutive coactivator of PPAR-gamma-like protein 1             | Novel | No effect |
| 131                          | <i>SLC16A3</i>        | Monocarboxylate transporter 4                                     | Novel | No effect |
| 132                          | <i>SLC1A5</i>         | Neutral amino acid transporter B(0)                               | Known | No effect |
| 133                          | <i>POM121C</i>        | Nuclear envelope pore membrane protein POM 121C                   | Novel | No effect |
| 134                          | <i>SLC16A1</i>        | Monocarboxylate transporter 1                                     | Novel | No effect |
| 135                          | <i>SLC25A3</i>        | Phosphate carrier protein, mitochondrial                          | Novel | No effect |
| 136                          | <b><i>SLC25A5</i></b> | <b>ADP/ATP translocase 2</b>                                      | Known | Impaired  |
| 137                          | <i>SLC2A1</i>         | Solute carrier family 2, facilitated glucose transporter member 1 | Novel | No effect |
| 138                          | <i>SLC7A5</i>         | Large neutral amino acids transporter small subunit 1             | Novel | No effect |
| <b>Translational protein</b> |                       |                                                                   |       |           |
| 139                          | <i>RPL13</i>          | 60S ribosomal protein L13                                         | Known | No effect |

|                           |                     |                                                  |              |                 |
|---------------------------|---------------------|--------------------------------------------------|--------------|-----------------|
| 140                       | <i>RPL11</i>        | 60S ribosomal protein L11                        | Novel        | No effect       |
| 141                       | <i>RPS3</i>         | 40S ribosomal protein S3                         | Novel        | No effect       |
| 142                       | <i>RPS18</i>        | 40S ribosomal protein S18                        | Known        | No effect       |
| 143                       | <i>TUFM</i>         | Elongation factor Tu, mitochondrial              | Novel        | No effect       |
| 144                       | <i>RPS27</i>        | 40S ribosomal protein S27                        | Novel        | No effect       |
| 145                       | <i>BOP1</i>         | Ribosome biogenesis protein BOP1                 | Known        | No effect       |
| 146                       | <i>RPL10L</i>       | 60S ribosomal protein L10-like                   | Novel        | No effect       |
| 147                       | <i>RPS11</i>        | 40S ribosomal protein S11                        | Novel        | No effect       |
| 148                       | <i>PELO</i>         | Protein pelota homolog                           | Known        | No effect       |
| 149                       | <i>RPS2</i>         | 40S ribosomal protein S2                         | Novel        | No effect       |
| <b>Dead box proteins</b>  |                     |                                                  |              |                 |
| 150                       | <i>DDX20</i>        | Probable ATP-dependent RNA helicase DDX20        | Novel        | No effect       |
| 151                       | <i>DDX28</i>        | Probable ATP-dependent RNA helicase DDX28        | Novel        | No effect       |
| 152                       | <i>DDX39A</i>       | ATP-dependent RNA helicase DDX39A                | Novel        | No effect       |
| 153                       | <b><i>DDX46</i></b> | <b>Probable ATP-dependent RNA helicase DDX46</b> | <b>Known</b> | <b>Impaired</b> |
| 154                       | <b><i>DDX47</i></b> | <b>Probable ATP-dependent RNA helicase DDX47</b> | <b>Known</b> | <b>Impaired</b> |
| 155                       | <b><i>DDX5</i></b>  | <b>Probable ATP-dependent RNA helicase DDX5</b>  | <b>Known</b> | <b>Impaired</b> |
| <b>Ribosomal proteins</b> |                     |                                                  |              |                 |
| 156                       | <i>RP9</i>          | Retinitis pigmentosa 9 protein                   | Novel        | No effect       |
| 157                       | <i>RPS16</i>        | 40S ribosomal protein S16                        | Novel        | No effect       |
| 158                       | <i>RPS27A</i>       | Ubiquitin-40S ribosomal protein S27a             | Novel        | No effect       |
| 159                       | <i>RPS6KA1</i>      | Ribosomal protein S6 kinase alpha-1              | Novel        | No effect       |

|                      |                       |                                                           |              |                 |
|----------------------|-----------------------|-----------------------------------------------------------|--------------|-----------------|
| 160                  | <i>RPS6KA3</i>        | Ribosomal protein S6 kinase alpha-3                       | Novel        | No effect       |
| 161                  | <i>RPS6KA4</i>        | Ribosomal protein S6 kinase alpha-4                       | Novel        | No effect       |
| 162                  | <i>WDR12</i>          | Ribosome biogenesis protein WDR12                         | Novel        | No effect       |
| 163                  | <i>NOLC1</i>          | Nucleolar and coiled-body phosphoprotein                  | Novel        | No effect       |
| <b>Miscellaneous</b> |                       |                                                           |              |                 |
| 164                  | <b><i>RICTOR</i></b>  | <b>Rapamycin-insensitive companion of mTOR</b>            | <b>Novel</b> | <b>Impaired</b> |
| 165                  | <i>PPIG</i>           | Peptidyl-prolyl cis-trans isomerase G                     | Novel        | No effect       |
| 166                  | <b><i>GPATCH8</i></b> | <b>G patch domain-containing protein 8</b>                | <b>Novel</b> | <b>Impaired</b> |
| 167                  | <i>EPB41L4A</i>       | Band 4.1-like protein 4A                                  | Novel        | No effect       |
| 168                  | <b><i>BRD3</i></b>    | <b>Bromodomain-containing protein 2/3</b>                 | <b>Known</b> | <b>Impaired</b> |
| 169                  | <i>ESYT2</i>          | Extended synaptotagmin-2                                  | Novel        | No effect       |
| 170                  | <i>DNAJA3</i>         | DnaJ homolog subfamily A member 3, mitochondrial          | Novel        | No effect       |
| 171                  | <i>C12ORF43</i>       | Protein CUSTOS                                            | Novel        | No effect       |
| 172                  | <i>SDAD1</i>          | Protein SDA1 homolog                                      | Novel        | No effect       |
| 173                  | <i>FARP1</i>          | FERM, ARHGEF and pleckstrin domain-containing protein 1   | Novel        | No effect       |
| 174                  | <b><i>CFAP20</i></b>  | <b>Cilia- and flagella-associated protein 20</b>          | <b>Novel</b> | <b>Impaired</b> |
| 175                  | <i>ZNF90</i>          | Zinc finger protein 90                                    | Novel        | No effect       |
| 176                  | <i>ANKS3</i>          | Ankyrin repeat and SAM domain-containing protein 3        | Novel        | No effect       |
| 177                  | <b><i>ZC3H18</i></b>  | <b>Zinc finger CCCH domain-containing protein 18</b>      | <b>Known</b> | <b>Impaired</b> |
| 178                  | <i>MCTP2</i>          | Multiple C2 and transmembrane domain-containing protein 2 | Novel        | No effect       |
| 179                  | <i>LUC7L3</i>         | Luc7-like protein 3                                       | Novel        | No effect       |
| 180                  | <b><i>GRAMD1A</i></b> | <b>GRAM Domain Containing 1A</b>                          | <b>Novel</b> | <b>Impaired</b> |

|            |                        |                                                  |              |                 |
|------------|------------------------|--------------------------------------------------|--------------|-----------------|
| 181        | <i>TONSL</i>           | Tonsoku-like protein                             | Novel        | No effect       |
| 182        | <i>HSPD1</i>           | 60 kDa heat shock protein, mitochondrial         | Novel        | No effect       |
| 183        | <i>KRI1</i>            | Protein KRI1 homolog                             | Novel        | No effect       |
| 184        | <i>TTC14</i>           | Tetratricopeptide repeat protein 14              | Novel        | No effect       |
| 185        | <i>PAF1</i>            | Peroxisome biogenesis factor 2                   | Novel        | No effect       |
| 186        | <i>SREK1IP1</i>        | Protein SREK1IP1                                 | Novel        | No effect       |
| <b>187</b> | <b><i>KIAA1522</i></b> | <b>Uncharacterized protein KIAA1522</b>          | <b>Known</b> | <b>Impaired</b> |
| 188        | <i>ATAD3A</i>          | ATPase family AAA domain-containing protein 3A   | Novel        | No effect       |
| 189        | <i>SMN1/SMN2</i>       | Survival motor neuron protein                    | Novel        | No effect       |
| 190        | <i>PHRF1</i>           | PHD and RING finger domain-containing protein 1  | Novel        | No effect       |
| 191        | <i>NKAPL</i>           | NKAP-like protein                                | Novel        | No effect       |
| <b>192</b> | <b><i>ANKRD11</i></b>  | <b>Ankyrin repeat domain-containing</b>          | <b>Novel</b> | <b>Impaired</b> |
| 193        | <i>C18ORF25</i>        | Uncharacterized protein C18orf25                 | Novel        | No effect       |
| <b>194</b> | <b><i>CFAP97</i></b>   | <b>Cilia- and flagella-associated protein 97</b> | <b>Novel</b> | <b>Impaired</b> |

1 Note: Bold are the proteins showing impaired interaction, green color is for proteins showing impaired interaction but already known partners of CK2 whereas  
2 yellow colored proteins are novel showing impaired interaction.

3



- 1 **Table S4.** List of differentially expressed genes found in transcriptome data
- 2 **Table S5.** List of phosphoproteome found in wild-type and patient LCLs
- 3 **Table S6.** List of nonphosphorylated motifs observed in patient LCLs
- 4 **Table S7.** List of hyper-phosphorylated motifs observed in patient LCLs
- 5 **Table S8.** Putative CK2 target motifs found non-phosphorylated in the patient
- 6 LCLs
- 7

- 1 **Table S9.** List of the reported proteins containing CK2 phosphosites, hypo-phosphorylated in mutant LCLs.

| Serial No. | Unique identifier | Gene name      | Protein name | -Log T-test p-value Mut_WT | -Log T-test difference Mut_WT | Mean log2 Mut | Mean log2 Mut | Position | A.A | Motif sequence                   |
|------------|-------------------|----------------|--------------|----------------------------|-------------------------------|---------------|---------------|----------|-----|----------------------------------|
| 1          | UID878            | <i>MATR3</i>   | A0A0R4J2E8   | 1,84661                    | -2,90348                      | 0             | 25,3679       | 604      | S   | KDKSRKRSYSPDGKESPSDKKSKTDGSQKTE  |
| 2          | UID1267           | <i>SRRM1</i>   | A9Z1X7       | 2,24326                    | -3,37243                      | 0             | 25,9          | 724      | S   | VRRGASSSPQRRQSPSPSTRPIRRVSRTPPEP |
| 3          | UID2107           | <i>TCOF1</i>   | J3KQ96       | 3,16556                    | -3,70411                      | 0             | 26,4862       | 349      | S   | KPEEDSESSSEESSDSEEEETPAAKALLQAKA |
| 4          | UID2831           | <i>HNRNPA1</i> | F8W6I7       | 1,67231                    | -1,38036                      | 0             | 24,3194       | 298      | S   | FAKPRNQGGYGGSSSSSYGSGRRF_____    |
| 5          | UID3058           | <i>CEP170</i>  | H0Y2V6       | 1,85526                    | -2,24501                      | 0             | 24,2167       | 922      | S   | LVTGETERKSTQKRKSFSTLYKDRCSTGSPS  |
| 6          | UID3358           | <i>PML</i>     | H3BT57       | 1,72813                    | -2,80895                      | 0             | 25,1201       | 38       | S   | MPPPETPSEGRQPSPSPSPTERAPASEEEFQ  |
| 7          | UID5310           | <i>CTPS1</i>   | P17812       | 3,32585                    | -8,23113                      | 0             | 30,665        | 562      | S   | SVGRLSHYLQKGCRLSPRDYSDRSGSSSPD   |
| 8          | UID5428           | <i>LMNB1</i>   | P20700       | 2,48576                    | -0,919029                     | 0             | 23,3732       | 278      | S   | ELEQTYHAKLENARLSSEMNTSTVNSAREEL  |
| 9          | UID5578           | <i>RPL13</i>   | P26373       | 1,36496                    | -1,8067                       | 0             | 23,8933       | 106      | S   | ARTIGISVDPRRRNKSTESLQANVQLKEYR   |
| 10         | UID5814           | <i>DEK</i>     | P35659       | 1,96599                    | -1,40587                      | 0             | 24,0236       | 231      | S   | KAKRTKCEILSDESSSDEDEKKNKEESSDD   |
| 11         | UID5846           | <i>RBMX</i>    | P38159       | 1,47344                    | -1,66209                      | 0             | 24,2072       | 221      | S   | YLSPRDDGYSTKDSYSSRDYPSRRDTRDYAP  |
| 12         | UID5867           | <i>BRCA1</i>   | P38398       | 3,5814                     | -2,36493                      | 0             | 24,7581       | 1642     | S   | AMEESVSREKPELTASTERVNRKMSMVVSGL  |
| 13         | UID6696           | <i>SPTBN1</i>  | Q01082       | 1,60399                    | -1,43035                      | 0             | 23,9776       | 825      | S   | LPQEHAESPDVRGRLSGIEERYKEVAELTRL  |
| 14         | UID6945           | <i>SSRP1</i>   | Q08945       | 1,56733                    | -1,97234                      | 0             | 24,6804       | 659      | S   | SRGSSSKSSSRQLSEFSKKEFVSSDESSSG   |
| 15         | UID7394           | <i>SQSTM1</i>  | Q13501       | 2,01105                    | -2,56307                      | 0             | 24,852        | 266      | S   | LGIEVDIDVEHGGKRSRLTPVSPESSTEEK   |
| 16         | UID7746           | <i>GAPVD1</i>  | Q14C86       | 1,74977                    | -2,42111                      | 0             | 24,8049       | 914      | S   | RSRSDIVSSVRRPMSDPWNRRPGNEEREL    |
| 17         | UID7874           | <i>SKIV2L</i>  | Q15477       | 1,51594                    | -1,923                        | 0             | 24,4506       | 245      | S   | AVGQPGGPRGDTVASAPCSAPLARASSLEDL  |

|    |          |         |        |         |          |   |         |      |   |                                 |
|----|----------|---------|--------|---------|----------|---|---------|------|---|---------------------------------|
| 18 | UID8348  | ZC3H13  | Q5T200 | 1,85281 | -1,75648 | 0 | 24,1883 | 325  | S | KRDKPRSTSPAGQHHSPISSRHSSSSSQSGS |
| 19 | UID8683  | ARL6IP4 | Q66PJ3 | 3,53654 | -2,2089  | 0 | 25,173  | 239  | S | TSQGRKASTAPGAEASPCITERSKQKARR   |
| 20 | UID10997 | IWS1    | Q96ST2 | 1,9635  | -1,80155 | 0 | 24,6343 | 261  | S | RISDSESEDPHRHQASDSENEELPKPRISDS |
| 21 | UID11340 | HIRIP3  | Q9BW71 | 2,11588 | -2,53742 | 0 | 24,6738 | 305  | S | DSEEEQKEAASSGDDSGRDREPPVQRKSEDR |
| 22 | UID11547 | KLC2    | Q9H0B6 | 2,47137 | -2,56392 | 0 | 24,6784 | 507  | S | VELLKDGSGRRGDRRSSRDMAGGAGPRSESD |
| 23 | UID12778 | SRRM2   | Q9UQ35 | 3,20399 | -5,75498 | 0 | 28,101  | 353  | S | KDKDKKEKSATRPSPSERSSTGPEPPAPTP  |
| 24 | UID13128 | THRAP3  | Q9Y2W1 | 2,32333 | -2,48784 | 0 | 24,7002 | 560  | S | RDKLGAKGDFPTGKSSFSITREAVNVRMDS  |
| 25 | UID14242 | ANP32A  | P39687 | 2,42683 | -5,44456 | 0 | 28,025  | 15   | T | _MEMGRRIHLELRNRTPSDVKELVLDNSRSN |
| 26 | UID14552 | IF16    | Q16666 | 1,964   | -1,70463 | 0 | 24,2853 | 779  | T | RKNKKDILNPDSSMETSPPDFF_____     |
| 27 | UID26065 | CHAMP1  | Q96JM3 | 1,9457  | -2,00867 | 0 | 24,7963 | 386  | S | KSSSVSPSSWKSPASPESWKSGPELRKTA   |
| 28 | UID12196 | FAM120A | Q9NZB2 | 2,50489 | -1,5054  | 0 | 24,4097 | 1023 | S | YKNQAAIQGRPPYAASAEVAKELKSKSGES  |
| 29 | UID12507 | FAM208A | Q9UK61 | 3,65328 | -2,67363 | 0 | 25,5076 | 673  | S | SRGEAIIQGRSSHSLDYDKDRVKELINLI   |
| 30 | UID11394 | FANCD2  | Q9BXW9 | 2,68882 | -1,90693 | 0 | 24,5454 | 891  | S | GSKTSSDTLSEEKNECDPTPSHRGQLNKE   |
| 31 | UID12086 | GPATCH2 | Q9NW75 | 2,09749 | -1,82992 | 0 | 24,4595 | 54   | S | SSEQARGGFAETGDHSRSISCIPLRQARKRR |
| 32 | UID24474 | HDGFRP2 | Q7Z4V5 | 2,08159 | -2,05645 | 0 | 24,5757 | 369  | S | RERADRGEAERGSGGSSGDELREDEPVKRR  |
| 33 | UID7122  | ILF3    | Q12906 | 4,37204 | -2,47526 | 0 | 24,8753 | 810  | S | GGGGSDYNYESKFNYSGSGGRSGGNSYSGGG |
| 34 | UID25303 | KDM2B   | Q8NHM5 | 2,00112 | -3,10998 | 0 | 25,4933 | 474  | S | KKPKAPALRFLKRTLSENEESVKSTTLAVD  |
| 35 | UID4291  | KIF1C   | O43896 | 4,14194 | -5,04269 | 0 | 27,4672 | 1092 | S | RYPPYTTPPRMRQRSAPDLKESGAAV____  |
| 36 | UID28523 | PAXBP1  | Q9Y5B6 | 1,42533 | -3,80199 | 0 | 26,7574 | 557  | S | AREQTGKMADHLEGLSSDDEETSTDITNFNL |

|    |          |               |        |         |          |   |         |      |   |                                 |
|----|----------|---------------|--------|---------|----------|---|---------|------|---|---------------------------------|
| 37 | UID24917 | <i>PELP1</i>  | Q8IZL8 | 2,17346 | -3,27119 | 0 | 26,0756 | 485  | S | ADALKLRSPRGSPDGLQTGKPSAPKKLKD   |
| 38 | UID7149  | <i>PRDM2</i>  | Q13029 | 1,75865 | -1,59707 | 0 | 24,4618 | 739  | S | SMLPVTSSRFKRTSSPPSSPQHSPALRDFG  |
| 39 | UID9258  | <i>RBBP6</i>  | Q7Z6E9 | 3,86433 | -2,66185 | 0 | 25,311  | 1699 | S | QVGISRNQSHSSPSVSPSRSHSPSGSQTRSH |
| 40 | UID6526  | <i>RPS3A</i>  | P61247 | 2,09668 | -2,08137 | 0 | 24,5827 | 236  | S | PKFELGKLMELHGEGSSGKATGDETGAKVE  |
| 41 | UID18056 | <i>SCAF11</i> | F8VXG7 | 3,02145 | -1,931   | 0 | 24,9008 | 688  | S | RSPKRDTTRESRRSELSPRRETSRENKRSQ  |
| 42 | UID1773  | <i>SRRT</i>   | C9JUL9 | 2,12054 | -1,95044 | 0 | 24,6615 | 11   | S | ____MAPSDRAMGDSDEYDRRRRDKFRRE   |
| 43 | UID6864  | <i>SRSF11</i> | Q05519 | 4,17754 | -9,0552  | 0 | 31,9729 | 449  | S | SEKEKKEKKPIETGSPKTKECVKEGTGDS   |
| 44 | UID8408  | <i>UBR4</i>   | Q5T4S7 | 3,89185 | -3,93232 | 0 | 26,2725 | 1760 | S | FQSEPRISESLVRHASTSSPADKAKVTISDG |
| 45 | UID1568  | <i>USP39</i>  | B9A018 | 2,45224 | -2,63278 | 0 | 25,3719 | 43   | S | VKREDREREPEAASSRGSPVRVKREFEPAS  |
| 46 | UID11959 | <i>ANLN</i>   | Q9NQW6 | 2,4176  | -3,46981 | 0 | 26,1905 | 65   | S | QQPLSGGEEKSCTKPSPKKRCSDNTEVEVS  |
| 47 | UID17174 | <i>CLASP2</i> | E3W994 | 2,82457 | -3,43792 | 0 | 25,6775 | 529  | S | ARSSRIPRPSVSQGCSEASRESSRDTSPVR  |
| 48 | UID27144 | <i>CWC22</i>  | Q9HCG8 | 3,27482 | -1,9837  | 0 | 24,9613 | 61   | S | FDYSRSDYEHRRGRSYDSSMESRNRDREKR  |
| 49 | UID8000  | <i>DBN1</i>   | Q16643 | 2,52321 | -2,23062 | 0 | 24,9901 | 339  | S | SHRRMAPTPIPTRSPSDSSTASTPVAEQIER |
| 50 | UID4122  | <i>FYB</i>    | O15117 | 2,69347 | -2,25251 | 0 | 25,244  | 209  | S | PKPAFGQKPLSTENSHEDESPMKNVSSSKG  |
| 51 | UID24622 | <i>KTN1</i>   | Q86UP2 | 1,9361  | -2,04979 | 0 | 24,7763 | 75   | S | KKNKKKEIQNGNLHESDESVPDFKLSDAL   |
| 52 | UID2447  | <i>LMO7</i>   | E9PMS6 | 4,33436 | -4,71109 | 0 | 27,2906 | 316  | S | QKWQDDLAKWKDRRSYTSDLQKKKEEREEI  |
| 53 | UID9371  | <i>LUZP1</i>  | Q86V48 | 2,76122 | -3,51584 | 0 | 25,8246 | 440  | S | SFTNRRAAKASHMGVSTDSGTQETKKTEDRF |
| 54 | UID7357  | <i>MYO9B</i>  | Q13459 | 2,86149 | -3,56847 | 0 | 26,7478 | 1972 | S | GDEDREKEILIERIQSIKEEKEDITYRPEL  |
| 55 | UID9136  | <i>SETX</i>   | Q7Z333 | 2,15569 | -1,95276 | 0 | 24,2906 | 642  | S | MGKTSRKDMHCLASSPTFSKEPMKVQDSVL  |

|    |          |                |            |         |          |   |         |      |   |                                  |
|----|----------|----------------|------------|---------|----------|---|---------|------|---|----------------------------------|
| 56 | UID981   | <i>TJP2</i>    | A0A1B0GTW1 | 1,37164 | -2,40028 | 0 | 25,0543 | 229  | S | YSERSRLNSHGGRSRSWEDSPERGRPHERAR  |
| 57 | UID6983  | <i>AHNAK</i>   | Q09666     | 1,75803 | -2,2796  | 0 | 25,4353 | 5731 | S | KFNFSKPKGKGGVTGSPEASISGSKGDLKSS  |
| 58 | UID21347 | <i>ATRX</i>    | P46100     | 2,21981 | -2,68854 | 0 | 25,3956 | 675  | S | KTTPLRRPTETNPVTSNSDEECNETVKEKQK  |
| 59 | UID6628  | <i>BASP1</i>   | P80723     | 3,10991 | -4,6497  | 0 | 27,2906 | 194  | S | AAPSSKETPAATEAPSSTPKAQGPAASAEPP  |
| 60 | UID2679  | <i>CCDC82</i>  | F5H777     | 1,53395 | -2,06881 | 0 | 24,9692 | 219  | S | KVGVKRPRRVVEDEGSSVEMEQKTPEKTLAA  |
| 61 | UID14383 | <i>CENPC</i>   | Q03188     | 4,39618 | -2,24372 | 0 | 25,1936 | 130  | T | EVHQKILATDVSSKNTPDSSKISSRNINDHH  |
| 62 | UID902   | <i>DENND4A</i> | A0A0U1RR27 | 2,22261 | -2,58959 | 0 | 24,7865 | 966  | S | GYNLSLKDEVRRGDTSTEDIQEEKDKKGSDC  |
| 63 | UID8794  | <i>DHX57</i>   | Q6P158     | 3,56005 | -2,8242  | 0 | 25,112  | 74   | S | DDGDDFCIFSESRRPSRPSNSNISKGESRPK  |
| 64 | UID29344 | <i>EIF3G</i>   | O75821     | 1,43218 | -1,71542 | 0 | 23,6488 | 41   | T | VTSELLKGIPLATGDTSPPELLPGAPLPPP   |
| 65 | UID28941 | <i>HMX3</i>    | A6NHT5     | 2,0436  | -2,70737 | 0 | 25,8685 | 149  | T | ASEKALLRDSSPASGTDTRDSPEPLLKADPDH |
| 66 | UID13062 | <i>INPP5F</i>  | Q9Y2H2     | 1,77021 | -1,20438 | 0 | 24,2196 | 907  | S | CGIIASAPRLGSRSQLSSTSDSSVHAPSEIT  |
| 67 | UID7325  | <i>PPIG</i>    | Q13427     | 1,77154 | -2,08697 | 0 | 25,283  | 745  | S | NDHVHEKNKKFDHESSPGTDEDKSG_____   |
| 68 | UID501   | <i>RRBP1</i>   | A0A0A0MRV0 | 2,5356  | -1,67658 | 0 | 24,3632 | 1277 | S | KSHVEDGDIAGAPASSPEAPAEQDPVQLKT   |
| 69 | UID7670  | <i>RRP1B</i>   | Q14684     | 1,82784 | -2,40115 | 0 | 24,3473 | 513  | S | SQSGPSGSHPGQPRGSPTGGAQLLKRKRKLG  |
| 70 | UID5331  | <i>SON</i>     | P18583     | 2,0521  | -1,5906  | 0 | 24,263  | 2129 | S | QSKEDDDVIVNKPVSDSEEEEEPPFYHHPFK  |
| 71 | UID8638  | <i>ZMYM4</i>   | Q5VZL5     | 2,88464 | -1,65957 | 0 | 24,0498 | 1256 | S | SPRSDPLGSTQDHALSQESSEPGCRVRSIKL  |
| 72 | UID785   | <i>MEF2C</i>   | A0A0D9SGI5 | 2,09559 | -2,85107 | 0 | 25,218  | 419  | S | TPSRYPQHTRHEAGRSPVDSLSSCSSSYDGS  |

1 Note Mut = Mutant\_p.Asp32His, WT = Wild type, A.A = amino acid.

## Supplemental Method

### Variants identification

#### Patient 1

To reveal the disease-causing DNA variant(s), we subjected trio — patient, both parents — of family 1 to whole-exome sequencing using NimbleGen SeqCap EZ Human Exome Library v2.0 kit. Samples were run on an Illumina HiSeq 2000 system using a paired-end 2 × 100 bp protocol and data was generated as detailed previously.<sup>3;</sup> <sup>4</sup> For filtering and prioritizing genetic variants, we used our in-house VARBANK dataset and analysis tool kit.<sup>5</sup> Method of exome sequencing in remaining individuals is given in the supplementary section.

#### Patient 2

Trio clinical exome sequencing was performed for the Patient 2 and her parents by GeneDx (Gaithersburg, MD) using a proprietary capture system developed by GeneDx for next generation sequencing with CNV calling. Sequence was aligned to the UCSC build hg19 reference sequence. Mean depth of coverage was 114X with quality threshold (>10X reads) of 98.6% of exome. GeneDx's XomeAnalyzer was used to analyzed variant between the probands, parents and reference.

#### Patient 3

Genetic evaluation for patient 3 began with simultaneous chromosome analysis and chromosomal microarray. Chromosome analysis demonstrated a normal female karyotype. Chromosomal microarray via whole-genome array CGH and genotype with 180,000 oligonucleotide probes on the GRCh37/UCSC hg 19 build did not identify any copy number variations. Exome sequencing through a commercial laboratory identified a heterozygous pathogenic variant in *CSNK2B*, specified c.94G>A (p.Asp32Asn) (NM\_001320.7). Parental samples were not submitted to determine if this *CSNK2B* pathogenic variant was inherited or *de novo*, though parents have typical intellect and no contributory medical history. No other pathogenic variants or variants of uncertain significance were reported for the patient on exome sequencing.

#### Patient 4

To reveal the pathogenic variant in patient 4, we employed chromosomal microarray analysis which showed normal number of chromosomes. In parallel, this patient was also found negative for pathogenic mutations in *SCN1A* and *FMR1*, later is a causative gene of fragile X syndrome.<sup>6</sup> Eventually, WES revealed a novel pathogenic *de novo*

variant NM\_001320.7:c.374C>G;p.Ser125\* in *CSNK2B*.

### **Patient 5**

Initially, we employed targeted sequencing of genes associated with seizures/epilepsy which did not show any pathogenic variant, so the patient underwent singleton exome sequencing that identified the *CSNK2B* variant — NM\_001320.7:c.367+5delG. Inheritance of the variant is unknown.

### **Extended information for GestaltMatcher analysis**

GestaltMatcher spanned a 320-dimensional clinical face phenotype space (CFPS) defined by the feature vectors derived from DeepGestalt.<sup>7</sup> Each image is a point located in CFPS, and the cosine distance quantified the similarity between two images in the space. In CFPS, we consider the images with close distance to have a high overlap of syndromic facial features. Therefore, we ranked the patients by sorting the cosine distance.

We performed pairwise comparisons on the seven photos of patient-1 to patient-7 along with 3,533 images from 2,516 diagnosed patients with 816 syndromes in the Face2Gene database. The following two criteria selected the 2,571 patients from the database. A patient's diagnosed syndrome was not included in the model training and had less than seven subjects. By these selection criteria, we formed the CFPS with syndromes that have not been seen by the model and have very few subjects simulating the ultra-rare diseases.

### **Copy number analysis**

250 ng of DNA were digested with NspI and amplified with ligation-mediated PCR, purified, fragmented with DNase I, labelled with biotin and hybridized on array CytoScan HD (Thermo Fisher Scientific). After washing and staining with streptavidin on a GeneChip Fluidics Station 450, the arrays were scanned by GeneChip Scanner 3000. Finally, CEL files were generated with GeneChip Command Console software (Thermo Fisher Scientific) and analysed with the programs ChAS 3.0 (Thermo Fisher Scientific) and Nexus Copy Number 7.5 (BioDiscovery).

### **Minigene construction, transfection and RT-PCR**

To reveal the consequences of NM\_001320.7:c.367+5delG on *CSNK2B* transcript splicing, we constructed minigene vectors with the help of GenScript Biotech (Netherlands) B.V.. For this purpose, genomic fragments of wild-type and mutant *CSNK2B* (ENST00000375882.7;CSNK2B-203) spanning exon 4 to exon 6 were cloned



in mammalian expression vector, pCMV-3Tag-3a, using SacI/XhoI restriction sites. We used 1mg/ml polyethylenimine (PEI, Polysciences, 23966) to transfect HeLa cells for 24 hours. Subsequently, cells were subjected to isolate total RNA with the help of RNeasy Mini kit (Qiagen, 74104) which later was converted into cDNA using SuperScript III reverse transcriptase (RT) enzyme (ThermoFisher Scientific, 18080093). For PCR amplification, we used vector and insert specific forward and reverse primers, respectively. Oligonucleotides sequences are listed in Table S2. To detect different transcripts and aberrant splicing, amplified PCR product was subjected for Sanger sequencing.

## Supplementary References

1. Savatt, J.M., Azzariti, D.R., Faucett, W.A., Harrison, S., Hart, J., Kattman, B., Landrum, M.J., Ledbetter, D.H., Miller, V.R., and Palen, E. (2018). ClinGen's GenomeConnect registry enables patient-centered data sharing. *Human mutation* 39, 1668-1676.
2. Ernst, M.E., Baugh, E.H., Thomas, A., Bier, L., Lippa, N., Stong, N., Mulhern, M.S., Kushary, S., Akman, C.I., Heinzen, E.L., et al. (2021). CSNK2B: A broad spectrum of neurodevelopmental disability and epilepsy severity. *Epilepsia*.
3. Hussain, M.S., Baig, S.M., Neumann, S., Nurnberg, G., Farooq, M., Ahmad, I., Alef, T., Hennies, H.C., Technau, M., Altmuller, J., et al. (2012). A truncating mutation of CEP135 causes primary microcephaly and disturbed centrosomal function. *Am J Hum Genet* 90, 871-878.
4. Hussain, M.S., Baig, S.M., Neumann, S., Peche, V.S., Szczepanski, S., Nurnberg, G., Tariq, M., Jameel, M., Khan, T.N., Fatima, A., et al. (2013). CDK6 associates with the centrosome during mitosis and is mutated in a large Pakistani family with primary microcephaly. *Human Molecular Genetics* 22, 5199-5214.
5. Hussain, M.S., Battaglia, A., Szczepanski, S., Kaygusuz, E., Toliat, M.R., Sakakibara, S., Altmuller, J., Thiele, H., Nurnberg, G., Moosa, S., et al. (2014). Mutations in CKAP2L, the Human Homolog of the Mouse Radmis Gene, Cause Filippi Syndrome. *Am J Hum Genet* 95, 622-632.
6. Siomi, H., Choi, M., Siomi, M.C., Nussbaum, R.L., and Dreyfuss, G. (1994). Essential role for KH domains in RNA binding: impaired RNA binding by a mutation in the KH domain of FMR1 that causes fragile X syndrome. *Cell* 77, 33-39.
7. Gurovich, Y., Hanani, Y., Bar, O., Nadav, G., Fleischer, N., Gelbman, D., Basel-Salmon, L., Krawitz, P.M., Kamphausen, S.B., Zenker, M., et al. (2019). Identifying facial phenotypes of genetic disorders using deep learning. *Nat Med* 25, 60-64.
